# Supplementary material for: SARS-CoV-2 Omicron-neutralizing memory B-cells are elicited by two doses of BNT162b2 mRNA vaccine
Source: PubMed Central journal article supplement (PMC8939773; doi:10.1126/sciimmunol.abn8590), 2022-02-03
Supplement: sciimmunol.abn8590_sm.pdf [file sciimmunol.abn8590_sm.pdf]

Supplementary Materials for

**SARS-CoV-2 Omicron-neutralizing memory B-cells are elicited by two doses of BNT162b2 mRNA vaccine**

Ryutaro Kotaki *et al.*

Corresponding author: Yoshimasa Takahashi, ytakahas@niid.go.jp

DOI: 10.1126/sciimmunol.abn8590

**The PDF file includes:**

Figs. S1 to S5

**Other Supplementary Material for this manuscript includes the following:**

Table S1

# **SARS-CoV-2 Omicron-neutralizing memory B-cells are elicited by two doses of BNT162b2 mRNA vaccine**

**Authors:** Ryutaro Kotaki<sup>1†</sup>, Yu Adachi<sup>1†</sup>, Saya Moriyama<sup>1†</sup>, Taishi Onodera<sup>1†</sup>, Shuetsu Fukushi<sup>2</sup>, Takaki Nagakura<sup>1</sup>, Keisuke Tonouchi<sup>1</sup>, Kazutaka Terahara<sup>1</sup>, Lin Sun<sup>1</sup>, Tomohiro Takano<sup>1</sup>, Ayae Nishiyama<sup>1</sup>, Masaharu Shinkai<sup>3</sup>, Kunihiro Oba<sup>4</sup>, Fukumi Nakamura-Uchiyama<sup>5</sup>, Hidefumi Shimizu<sup>6</sup>, Tadaki Suzuki<sup>7</sup>, Takayuki Matsumura<sup>1</sup>, Masanori Isogawa<sup>1</sup>, Yoshimasa Takahashi<sup>1\*</sup>

## **Affiliations:**

<sup>1</sup>Research Center for Drug and Vaccine Development, National Institute of Infectious Diseases; Tokyo 162-8640, Japan.

<sup>2</sup>Department of Virology I, National Institute of Infectious Diseases; Tokyo 162-8640, Japan.

<sup>3</sup>Tokyo Shinagawa Hospital; Tokyo, 140-8522, Japan.

<sup>4</sup>Department of Pediatrics, Showa General Hospital; Tokyo, Japan

<sup>5</sup>Department of Infectious Diseases, Tokyo Metropolitan Bokutoh Hospital; Tokyo, Japan

<sup>6</sup>Department of Respiratory Medicine, JCHO Tokyo Shinjuku Medical Center; Tokyo, Japan

<sup>7</sup>Department of Pathology, National Institute of Infectious Diseases; Tokyo 162-8640, Japan.

\*Corresponding authors.

Yoshimasa Takahashi

Research Center for Drug and Vaccine Development, National Institute of Infectious Diseases

Email: [ytakahas@niid.go.jp](mailto:ytakahas@niid.go.jp)

†These authors contributed equally to this work.

## SUPPLEMENTARY MATERIALS

Fig. S1. Participant demographics.

Fig. S2. RBD-binding antibody titers and correlation to neutralizing activities.

Fig. S3. Flow cytometry gating strategy for RBD-binding B<sub>mem</sub> cells.

Fig. S4. Additional analyses on the vaccine-induced B<sub>mem</sub> cell subsets.

Fig. S5. S309 antibody binding to Omicron RBD

Supplemental Table S1: Raw data file (excel)

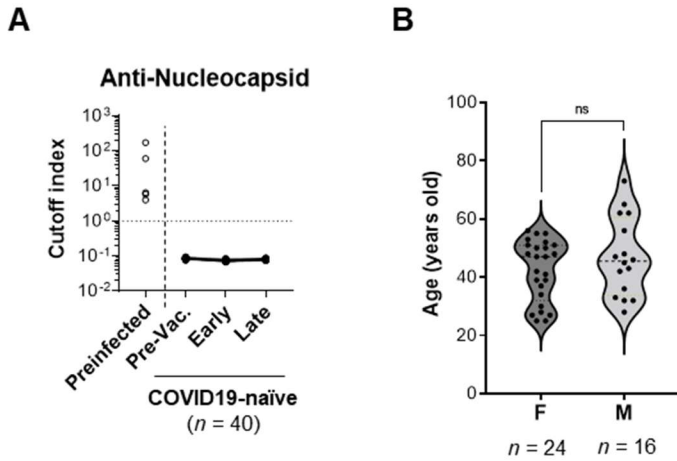

**Fig. S1. Participant demographics.**

(A) Anti-nucleocapsid antibody titers of plasma collected prior to the first vaccination and at the early and late time points were measured. The dotted line on the y-axis indicates a detection limit (1.0) for the assay provided from the manufacturer. Samples with values above the detection limit at the pre-vac. time point were excluded from subsequent analyses. (B) Age distribution of the subjects was analyzed using the Mann-Whitney U-test (ns, not significant:  $P \geq 0.05$ ).

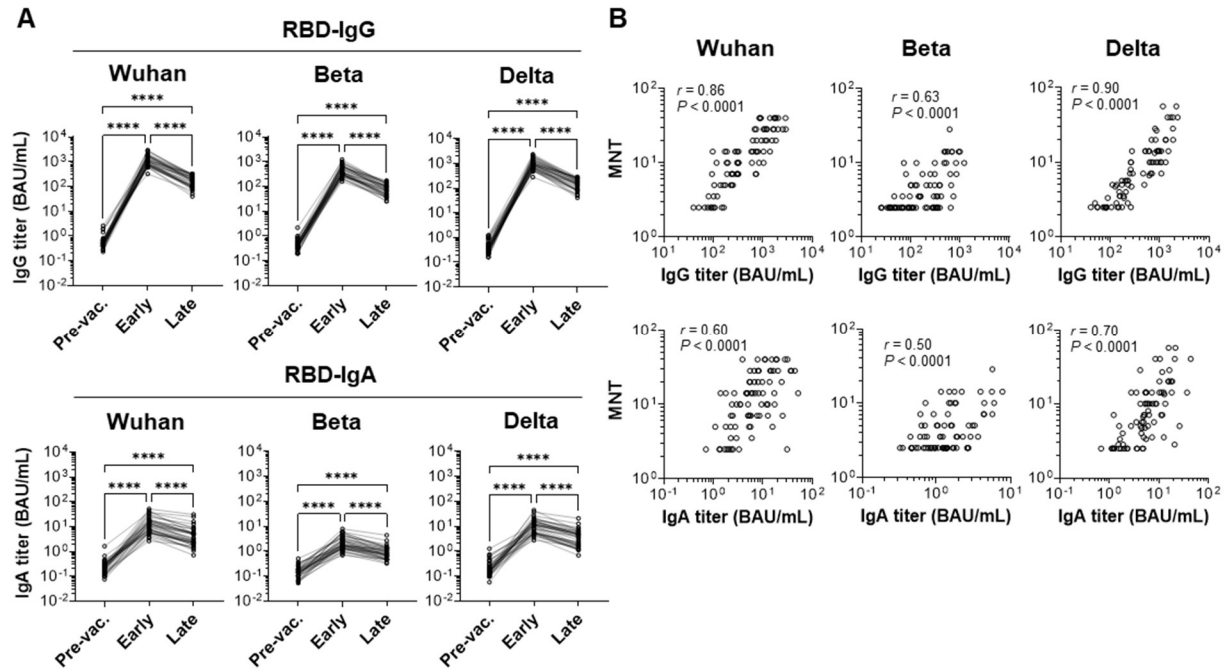

**Fig. S2. RBD-binding antibody titers and correlation to neutralizing activities.**

(A) Longitudinal RBD-binding IgG and IgA titers were measured using ECLIA. (B) Correlations between RBD-binding IgG or IgA and neutralizing titers were analyzed.

Statistical analyses were performed using the Friedman test (A) and Spearman's correlation analysis (B). \*\*\*\* $P < 0.0001$ . Data were pooled from more than two independent experiments.

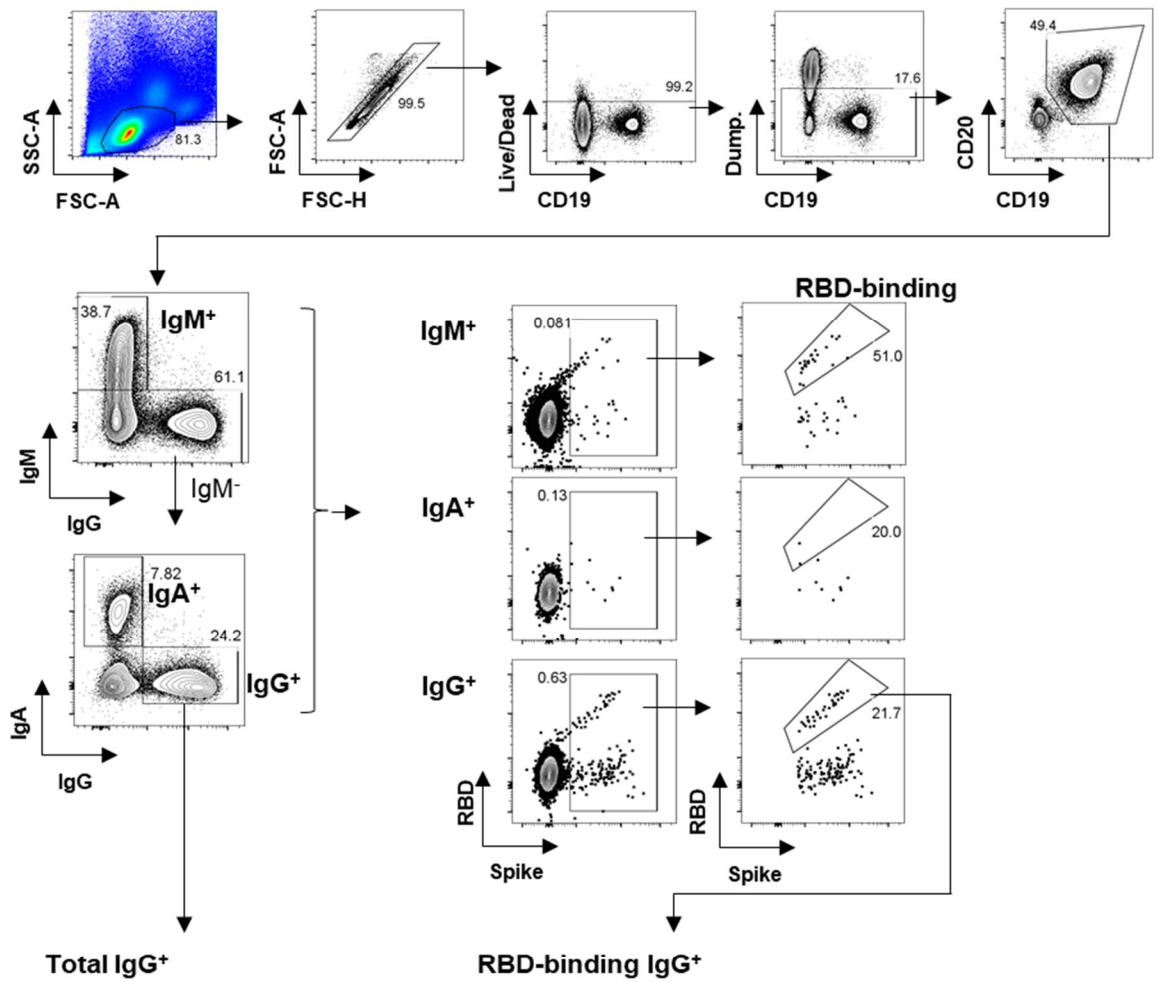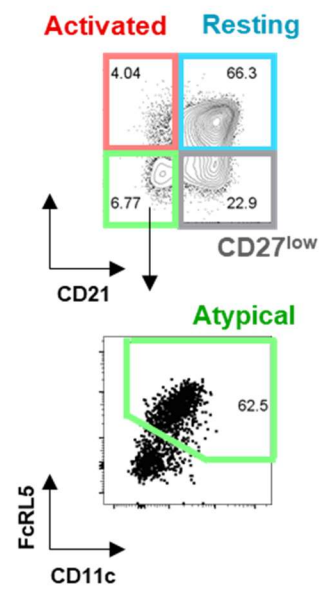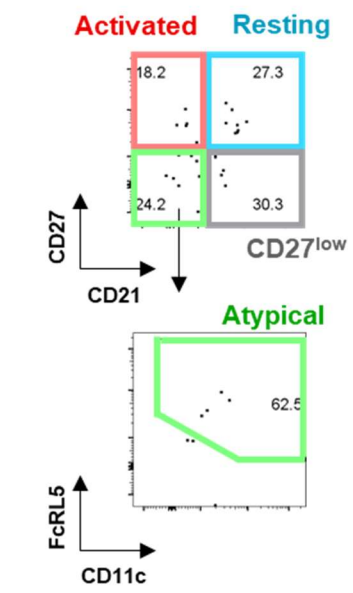

**Fig. S3. Flow cytometry gating strategy for RBD-binding B<sub>mem</sub> cells.**

RBD-binding IgM/IgA/IgG B<sub>mem</sub> cells were initially selected as Dump<sup>-</sup>CD19<sup>+</sup>CD20<sup>+</sup> cells and then divided into IgM<sup>+</sup>, IgA<sup>+</sup>, or IgG<sup>+</sup> cells. After gating on spike/RBD-binding cells, IgG<sup>+</sup> fractions were further delineated into B<sub>mem</sub> subsets based on CD21, CD27, CD11c, and FcRL5 expression as indicated in the plot. activated (CD21<sup>-</sup>CD27<sup>+</sup>), resting (CD21<sup>+</sup>CD27<sup>+</sup>), CD27<sup>low</sup> (CD21<sup>+</sup>CD27<sup>low</sup>), and atypical (CD21<sup>-</sup>CD27<sup>low</sup>CD11c<sup>+</sup>FcRL5<sup>+</sup>) subsets. Representative plots from four independent experiments are shown.



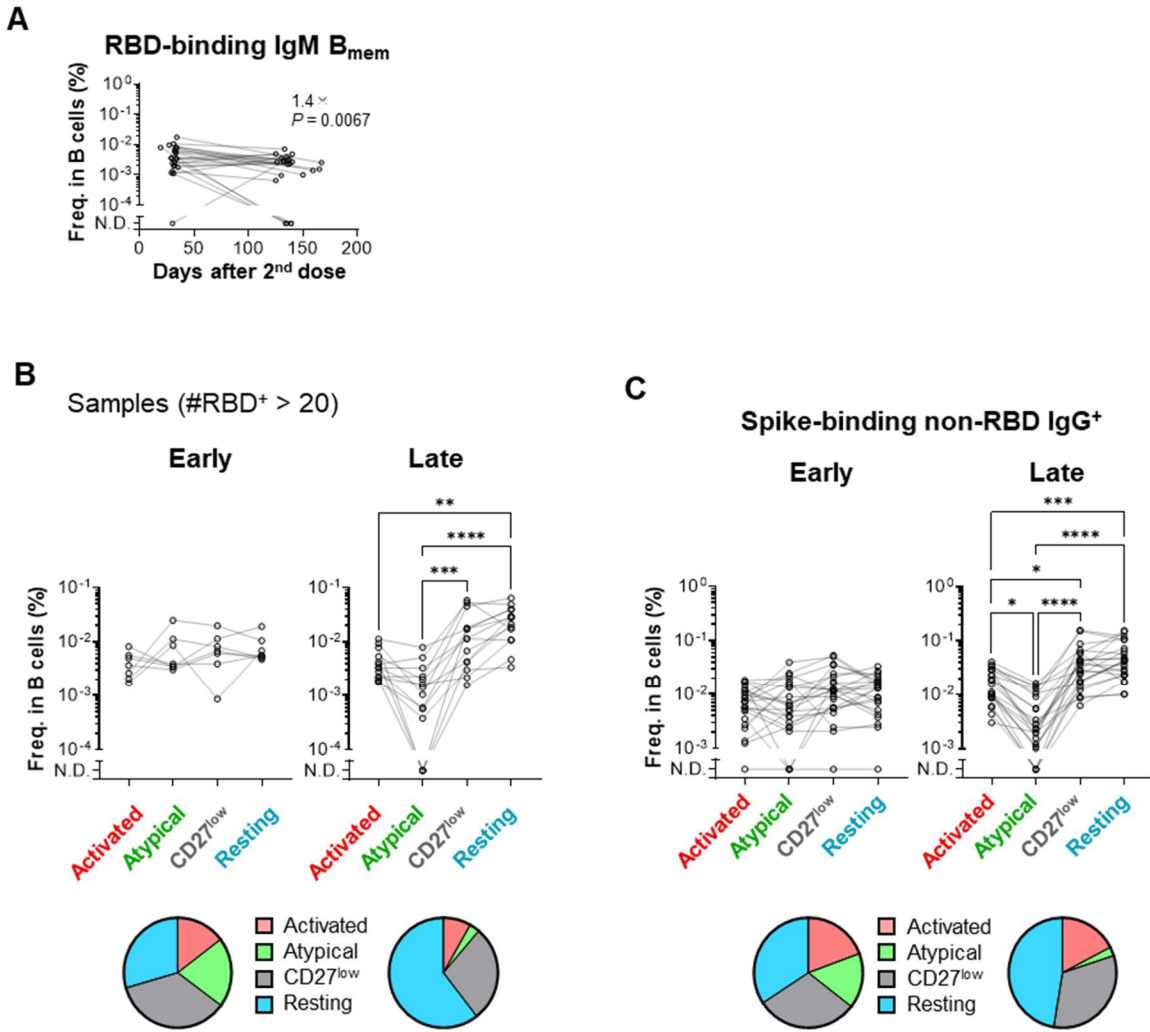

**Fig. S4. Additional analyses on the vaccine-induced B<sub>mem</sub> cell subsets.**

(A) Longitudinal frequencies of RBD-binding CD21<sup>+</sup>CD27<sup>+</sup> IgM B<sub>mem</sub> cells among CD19<sup>+</sup>CD20<sup>+</sup> B cells were analyzed ( $n = 23$ ). Values on the plots indicate fold decrease of median from the early to the late time points. (B) B<sub>mem</sub> cell subsets were analyzed using samples with >20 RBD-binding IgG B<sub>mem</sub> cells. In the pie charts, median frequency of B<sub>mem</sub> subsets among RBD-binding IgG<sup>+</sup> B cells were plotted (Early,  $n = 7$ ; Late,  $n = 14$ ). (C) B<sub>mem</sub> cell subsets were analyzed on Spike-binding, non-RBD-binding IgG<sup>+</sup> B<sub>mem</sub> cells ( $n = 23$ ). In the pie charts, median frequency of B<sub>mem</sub> subsets among RBD-binding IgG<sup>+</sup> B cells were plotted. Statistical

analyses were performed with the Wilcoxon test (A), and the Friedman test (B, C) ( $*P < 0.05$ ,  $**P < 0.01$ ,  $***P < 0.001$ ,  $****P < 0.0001$ ). Data were pooled from two independent experiments.

**Analyte: S309 IgG1**

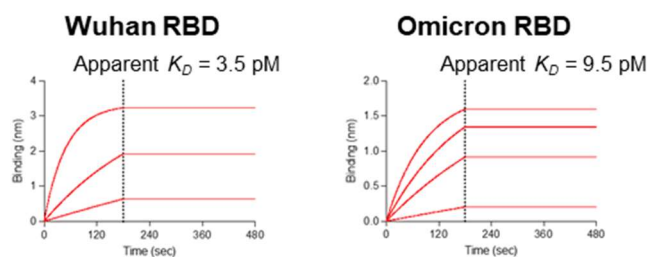

**Fig. S5. S309 antibody binding to Omicron RBD**

Binding of S309 IgG1 antibody to Wuhan-RBD (left) and Omicron-RBD (right) were quantitated with BLI. Biotinylated RBDs were captured on streptavidin-coated biosensors, and subsequently kinetics of S309 binding was analyzed. Signals were fitted to 1:1 binding model and apparent  $K_D$  values were calculated. Representative data from two independent experiments are shown.
